CORRECTION

# Correction: Voluntary Medical Male Circumcision for HIV Prevention in Malawi: Modeling the Impact and Cost of Focusing the Program by Client Age and Geography

**Katharine Kripke, Frank Chimbwandira, Zebedee Mwandu, Faustin Matchere, Melissa Schnure, Jason Reed, Delivette Castor, Sema Sgaier, Emmanuel Njeuhmeli**

There is an error in the Funding statement. The number for the Cooperative Agreement Project SOAR (Supporting Operational AIDS Research) is incorrect. The correct number is OAA-A-14-00060.

## Reference

1. Kripke K, Chimbwandira F, Mwandu Z, Matchere F, Schnure M, Reed J, et al. (2016) Voluntary Medical Male Circumcision for HIV Prevention in Malawi: Modeling the Impact and Cost of Focusing the Program by Client Age and Geography. PLOS ONE 11(7): e0156521. doi:[10.1371/journal.pone.0156521](https://doi.org/10.1371/journal.pone.0156521) PMID: [27410474](https://pubmed.ncbi.nlm.nih.gov/27410474/)

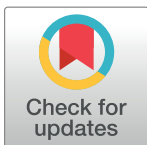

## OPEN ACCESS

**Citation:** Kripke K, Chimbwandira F, Mwandu Z, Matchere F, Schnure M, Reed J, et al. (2017) Correction: Voluntary Medical Male Circumcision for HIV Prevention in Malawi: Modeling the Impact and Cost of Focusing the Program by Client Age and Geography. PLoS ONE 12(1): e0169708. doi:[10.1371/journal.pone.0169708](https://doi.org/10.1371/journal.pone.0169708)

**Published:** January 3, 2017

**Copyright:** © 2017 Kripke et al. This is an open access article distributed under the terms of the [Creative Commons Attribution License](https://creativecommons.org/licenses/by/4.0/), which permits unrestricted use, distribution, and reproduction in any medium, provided the original author and source are credited.
